# Supplementary material
Source: MDPI journal article supplement (https://www.mdpi.com/2076-3417/12/17/8527)
Supplement: s1 [file Supplementary File S1 Interactive plot data722.xlsx]

## Sheet: Interactive plot data3
Applied Behavior Analysis
	P1	P2	P3			TD1	TD2
Baseline	30	20	20			80	90
	40	20	30			90	80
	30	20	50			70	80
	30	30	50			80	80
	40	40	40			90	90
	30	40	40			100	70
		30	50				80
Intervention1	60	20	40			100	80
	70		60			100
	80	50				100	80
	70	70	40			100	100
	80	60	70			80	100
	50	80	70			100	100
	70	70	70			100	100
	80	80	40			100	90
	70	70	80			100	100
		70	80				100
Reversal	40		90			90
	60	30	80			100	100
	60	70				90	80
		70	50				90
Intervention2	70		60			100
	80	60	60			100	100
	60	70				100	100
	60	80	80			90	100
	70	60	70			100	100
	80	60	60			100	100
	60	90	60			100	100
	80	90	70			100	90
	90	100	70			100	100
	Mantenance
	60	50	60			90	90
	50	40	50			100	100
	50	60	70			80	80
	60	70	60			90	100
	70	70	60			100	100
	60	60	50			100	100
Every Stages Average
Session\participants	P1	P2	P3			TD1	TD2
Baseline				Average				Average
	33.3333	27.5	42.2222	34.3519		85	81.25	83.125
									TD
Intervention1									Intervention1+Intervention2
	70	68.75	68.8889	69.213		97.7778	96.25	97.0139	Total Average		97.9167
Intervention2
	72.2222	76.25	68.3333	72.2685		98.8889	98.75	98.8194	ASD
Reversal									Intervention1+Intervention2
	53.3333	56.6667	56.6667	55.5556		93.3333	90	91.6667	Total Average		70.7407
Maintenance	Maintenance
	58.3333	58.3333	58.3333	58.3333		93.3333	95	94.1667

## Sheet: t test
Applied Behavior Analysis								Every Stages Average				T-test
	P1	P2	P3		TD1	TD2		Baseline and Reveral	Intervention1+Intervention2	mean difference		Number of samples	6
								33	70	37		Average of pairwise differences	26
Intervention1	60	50	40		100	80		28	68.75	40.75		Test value	0
	70	70	70		100	100		42	70	28		mean difference	26
	80	60	70		100	100		53	72	19		sample standard deviation of pairwise differences	11.5352
	70	80	70		100	100		57	76	19		Standard Error of Mean of Pairwise Differences	4.70922
	80	70	40		80	100		57	68	11		t-value	5.52109
	50	80	80		100	90				25.7917		p-value	0.00266985
	70	70	80		100	100						critical value	2.57058
	80	70	90		100	100						margin of error	12.1054
	70		80		100							The lower limit of the mean difference	13.8946
			80									The upper limit of the average difference	38.1054
AVERAGE	70	68.75	70		97.7778	96.25
Intervention2	70	60	80		100	100
	80	70	70		100	100
	60	80	60		100	100
	60	60	60		90	100
	70	60	70		100	100
	80	90	70		100	100
	60	90			100	90
	80	100			100	100
	90				100
AVERAGE	72.2222	76.25	68.3333		98.8889	98.75
					TD1	TD2
Baseline	30	20	20		80	90
	40	20	30		90	80
	30	20	50		70	80
	30	30	50		80	80
	40	40	40		90	90
	30	40	40		100	70
		30	50			80
		20	40
			60
AVERAGE	33.3333	27.5	42.2222		85	81.4286
Reversal	40	30	50		90	100
	60	70	60		100	80
	60	70	60		90	90
AVERAGE	53.3333	56.6667	56.6667		93.3333	90
